# Supplementary material for: Peptidomimetic blockade of MYB in acute myeloid leukemia
Source: PubMed Central journal article supplement (PMC5760651; doi:10.1038/s41467-017-02618-6), 2018-01-09
Supplement: 41467_2017_2618_MOESM1_ESM.pdf [file 41467_2017_2618_MOESM1_ESM.pdf]

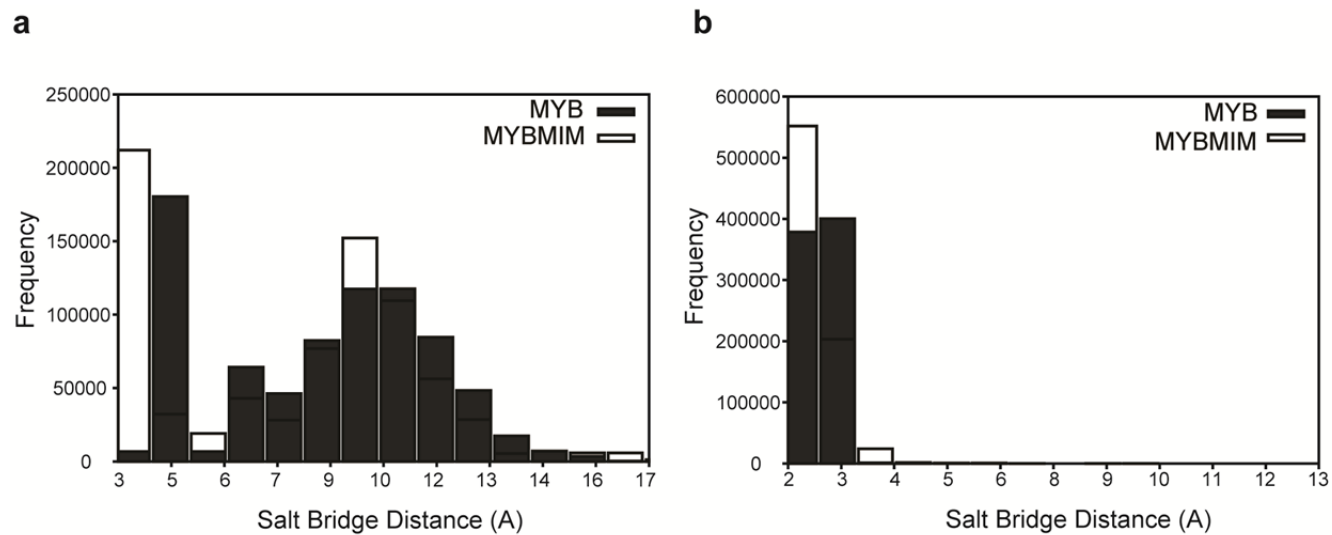

**Supplementary Figure 1.** Histograms of the distributions of distances of MYB:CBP for **(a)** R294:E665 and **(b)** E308:H602 salt bridges, as analyzed using replica exchange molecular dynamics simulations of the complexes of the CBP KIX domain with MYB and MYBMIM peptides.

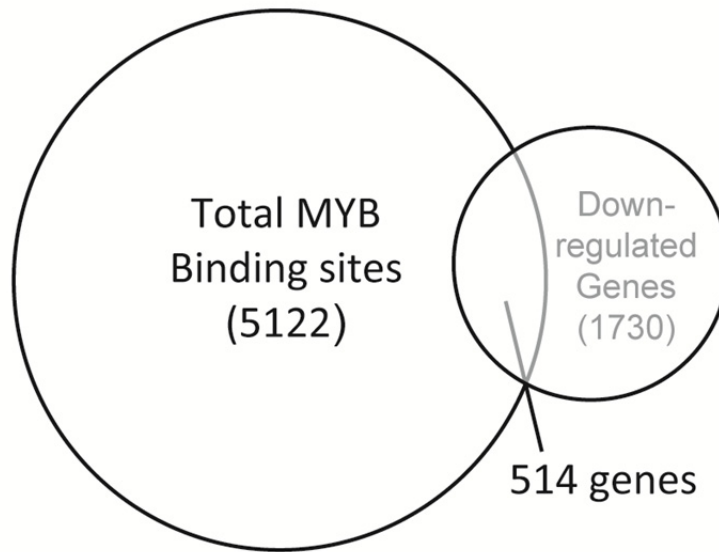

**Supplementary Figure 2.** Venn diagram representing the cross-section of the 5,122 MYB binding sites identified in ChIP-seq analysis as compared against the 1,730 down-regulated genes seen in RNA-seq gene expression data. 514 genes are identified in the intersection of MYB binding sites that occur within 50kb of down-regulated genes (29.7%).

| Downregulated                                                                     | Motif      | Fold change | p-value |
|-----------------------------------------------------------------------------------|------------|-------------|---------|
|  | MYB        | 5.6         | 1e-145  |
|  | ERG        | 2.5         | 1e-38   |
|  | CEBPA      | 9.9         | 1e-12   |
|  | RUNX1      | 6.3         | 1e-12   |
|  | Sp1/PU.1   | 4.3         | 1e-12   |
| Upregulated                                                                       |            |             |         |
|  | AMYB/MYBL1 | 4.5         | 1e-100  |
|  | JUNB       | 3.3         | 1e-14   |
|  | NFY        | 3.2         | 1e-11   |
|  | RFX1       | 2.7         | 1e-10   |
|  | FOXO1      | 2.3         | 1e-9    |

**Supplementary Figure 3.** Enrichment of top 5 transcription factor motifs in down-regulated and up-regulated MYB peaks upon MYBMIM treatment. Motifs are sorted based on p-values and fold change (% peaks/% in background) as indicated.

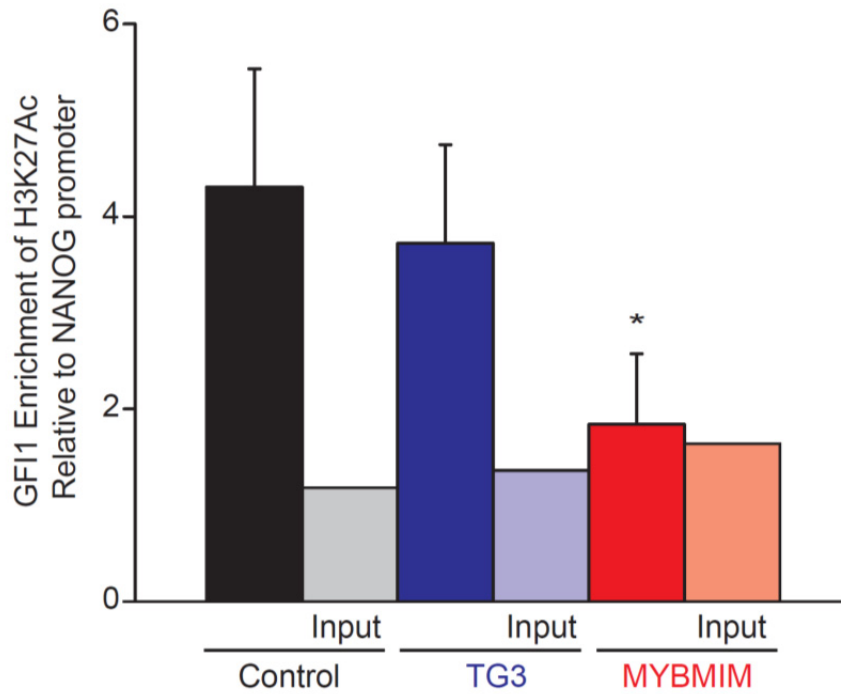

**Supplementary Figure 4.** Analysis of relative enrichment of H3K27Ac at the BCL2 enhancer locus compared to NANOG, as measured by ChIP-PCR upon treatment with control PBS (black), 20  $\mu$ M TG3 (blue), and 20  $\mu$ M MYBMIM (red) for 24 hours. Error bars represent standard deviations of three biological replicates. \*  $p = 0.04$  when compared to untreated control.

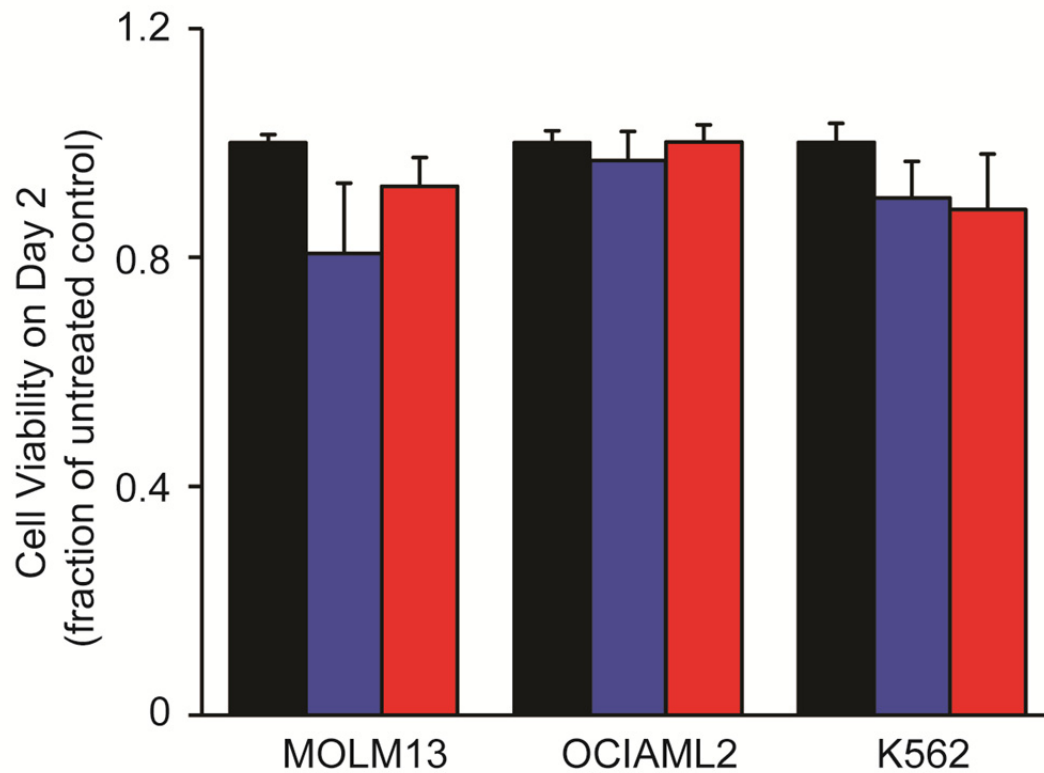

**Supplementary Figure 5.** Viability of MOLM13, OCIAML2, and K562 cells, treated for 2 days with control PBS (black), 20  $\mu$ M TATMYG (blue), and 20  $\mu$ M TATMYB (red). Error bars represent standard deviations of three biological replicates, with no significant differences noted between treatment conditions.

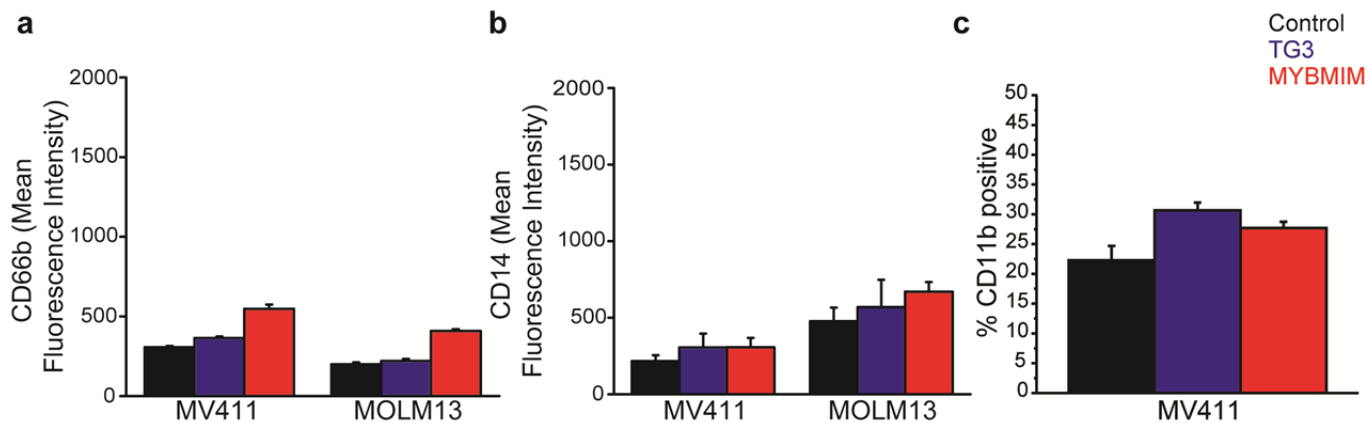

**Supplementary Figure 6.** Flow cytometry analysis of differentiation of AML cells upon control PBS (black), TG3 (blue), or MYBMIM (red) treatment at 20  $\mu$ M for 24 hours using CD66b (**a**), CD14 (**b**), and CD11b (**c**), as indicated.

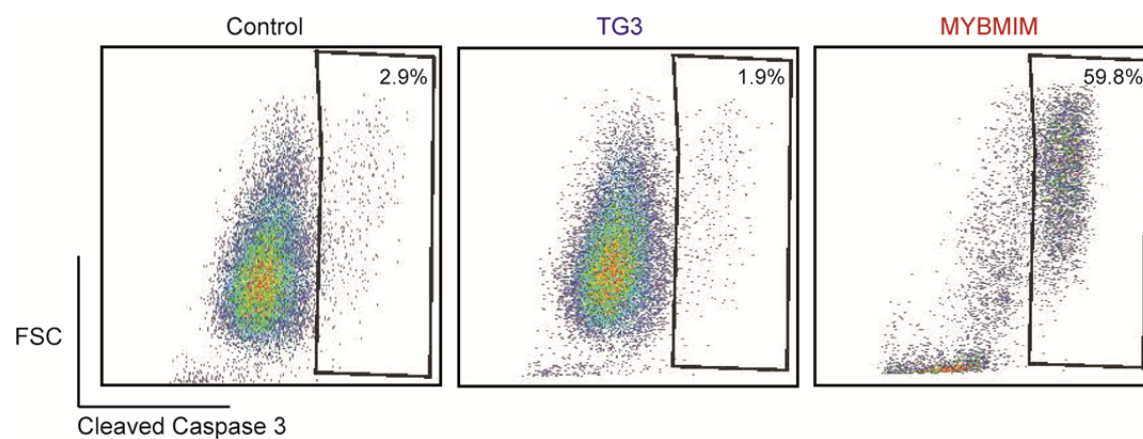

**Supplementary Figure 7.** Flow cytometry analysis of apoptosis of MV-411 cells upon peptide treatment at 20  $\mu\text{M}$  for 24 hours. Numbers denote percentage of cells that are positive for Cleaved Caspase 3.

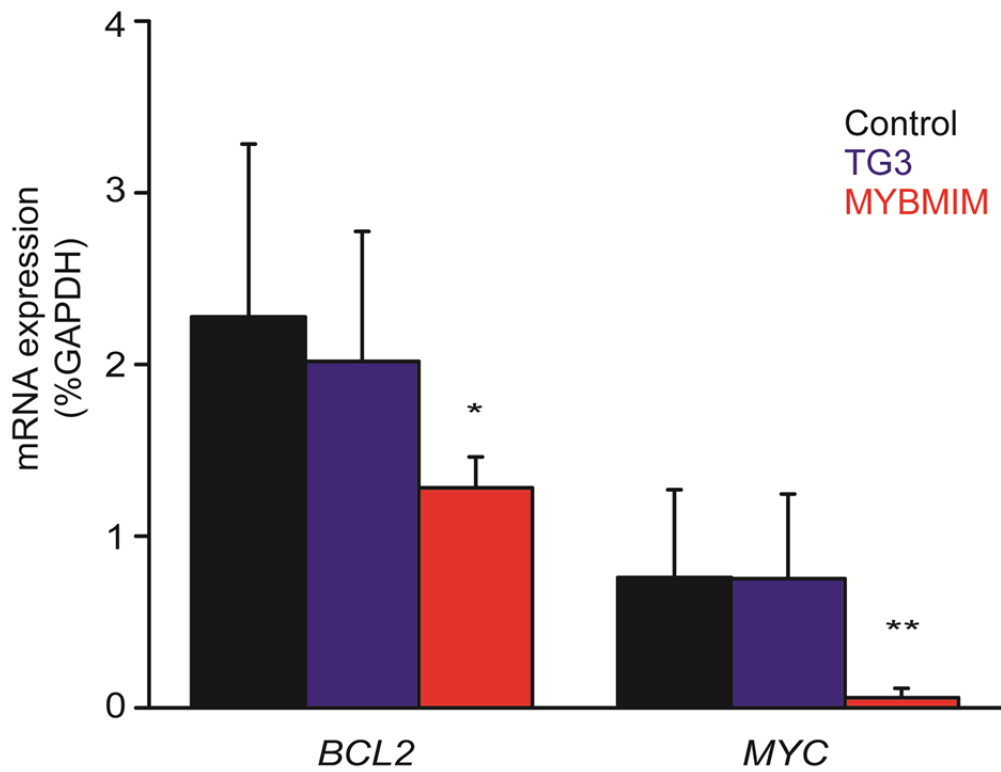

**Supplementary Figure 8.** Analysis of *BCL2* and *MYC* mRNA expression as measured by qRT-PCR in MOLM-13 cells, upon treatment with control PBS (black), 20  $\mu$ M TG3 (blue), and 20  $\mu$ M MYBMIM (red) for 6 hours. Error bars represent standard deviations of three biological replicates. \*,  $p = 0.0024$ ; \*\*,  $p = 0.077$  when compared to untreated control.



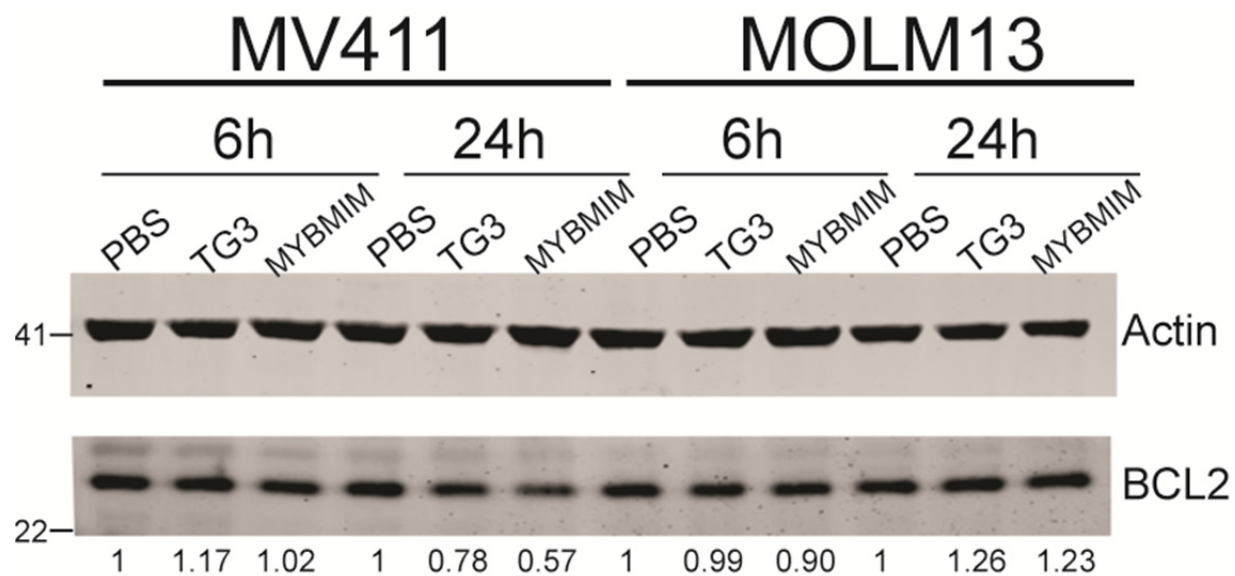

**Supplementary Figure 9.** BCL2 expression as measured by Western blot in MV411 and MOLM-13 cells, upon treatment with control PBS, 20  $\mu$ M TG3, and 20  $\mu$ M MYBMIM for 6 hours and 24 hours. BCL2 band intensities were normalized to their respective actin bands using ImageJ. BCL2 protein expression is quantified as a fraction of its respective PBS control (numbers below blot).

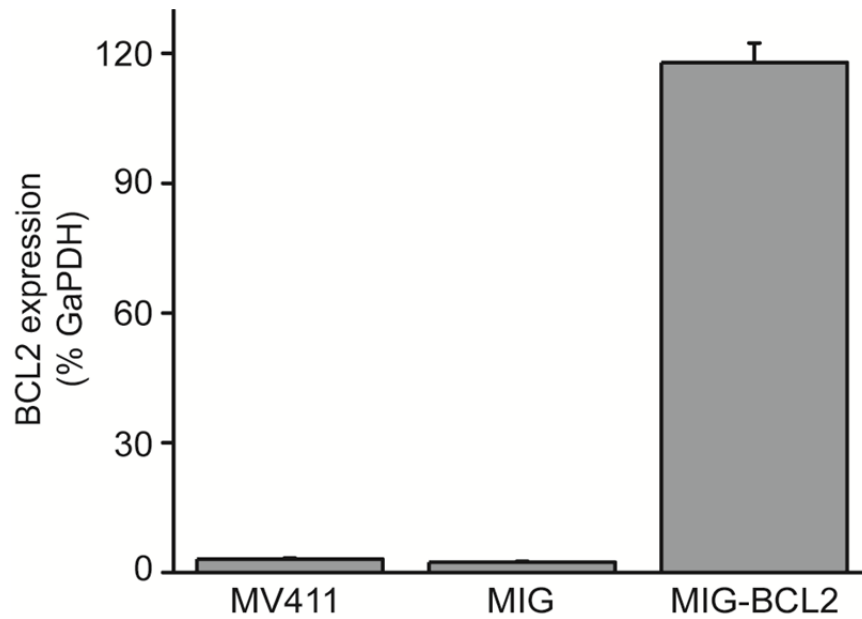

**Supplementary Figure 10.** Expression of BCL2 in cells retrovirally transduced with MSCV-IRES-GFP vector encoding BCL2. Expression is measured using RT-qPCR and normalized to GAPDH. Error bars represent standard deviations of 3 biological replicates.

**Supplementary Table 1: Polypeptide sequences of peptide constructs.**

| Name       | Sequence                                                          | Amino acid |
|------------|-------------------------------------------------------------------|------------|
| FITC-TAT   | FITC-AHA-YGRKKRRQRRR-[NH <sub>2</sub> ]                           | L          |
| TATMYB     | [Ac]-YGRKKRRQRRR-GGKRIKELELLLMSTENELK-[NH <sub>2</sub> ]          | L          |
| TATMYG     | [Ac]-YGRKKRRQRRR-GGKRIKELELLLMSTENGLK-[NH <sub>2</sub> ]          | L          |
| MYBMIM     | [Ac]-KLENETSMLLELEKIRKGG-RRRQRRKKRGY-[NH <sub>2</sub> ]           | D          |
| TG1        | [Ac]-KLENETSMGLLELEKIRKGG-RRRQRRKKRGY-[NH <sub>2</sub> ]          | D          |
| TG2        | [Ac]-KLGNETSMGLLELEKIRKGG-RRRQRRKKRGY-[NH <sub>2</sub> ]          | D          |
| TG3        | [Ac]-KLGNETSMGLLELEKIGKGG-RRRQRRKKRGY-[NH <sub>2</sub> ]          | D          |
| BIOMYB     | [Biotin]-YGRKKRRQRRR-GGKRIKELELLLMSTENELK-[NH <sub>2</sub> ]      | L          |
| BIO-MYBMIM | [Ac]-KLENETSMLLELEKIRKGG-RRRQRRKKRGY[K-Biotin]-[NH <sub>2</sub> ] | D          |

FITC, fluorescein isothiocyanate; AHA, 6-aminohexanoic acid; Ac, acetyl; Biotin,  $\alpha$ -amino biotin; K-Biotin, lysyl  $\epsilon$ -amino biotin.

**Supplementary Table 2: Significantly downregulated and upregulated gene sets signatures.**

**Downregulated**

| Gene set                           | NES   |
|------------------------------------|-------|
| HALLMARK_MYC_TARGETS_V2            | -2.54 |
| SCHUHMACHER_MYC_TARGETS_UP         | -2.23 |
| HALLMARK_E2F_TARGETS               | -1.99 |
| HESS_TARGETS_OF_HOXA9_AND_MEIS1_UP | -1.86 |
| MULLIGHAN_MLL_SIGNATURE_1_UP       | -1.82 |

**Upregulated**

| Gene set                         | NES  |
|----------------------------------|------|
| HALLMARK_TNFA_SIGNALING_VIA_NFKB | 2.93 |
| HALLMARK_APOPTOSIS               | 2.42 |
| HALLMARK_P53_PATHWAY             | 2.39 |
| HALLMARK_INFLAMMATORY_RESPONSE   | 2.24 |
| DANG_REGULATED_BY_MYC_DN         | 2.14 |

**Supplementary Table 3: Genetic characteristics of primary AML used in patient-derived xenograft transplant.**

| <b>Patient ID</b> | <b>Cytogenetics</b> | <b>Mutations</b>                                                                           |
|-------------------|---------------------|--------------------------------------------------------------------------------------------|
| Patient 11        | <i>MLL-ENL</i>      | <i>CREBBP_A467T</i><br><i>KRAS_G12C</i><br><i>WT1_R380fs*15</i><br><i>FBXO11_P49_Q50in</i> |

**Supplementary Table 4: Oligonucleotide sequences.**

| Primer                 | Sequence, 5'-3'           |
|------------------------|---------------------------|
| GAPDH, forward         | AATCCCATCACCATCTTCCA      |
| GAPDH, reverse         | TGGACTCCACGACGTA CTCA     |
| BCL2, forward          | CTGCACCTGACGCCCTTACC      |
| BCL2, reverse          | CACATGACCCACCGAACTCAAAGA  |
| MYC, forward           | TTCCCCTACCCTCTCAACGACAG   |
| MYC, reverse           | CCTCATCTTCTTGTTCCCTCCTCAG |
| BCL2 enhancer, forward | GAGCACAGCGCCAACAGAACTACT  |
| BCL2 enhancer, reverse | TTAAACTGACACGGCTGACTCTCC  |
| NANOG, forward         | TCACAAGGGTGGGTCAGTAG      |
| NANOG reverse          | CCAGCAGAACGTAAAATCC       |

**Supplementary Table 5: Body weights for MYBMIM treatment (indicated as a percentage of initial value), corresponding to experiment described in Figure 4I.**

| MYBMIM mouse Number | Treatment Day #1 | Day #2 | Day #3 | Day #4 | Day #5 | Day #6 | Day #7 | Day #8 | Day #9 | Day #10 | Day #11 | Day #12 | Day #13 | Day #14 |
|---------------------|------------------|--------|--------|--------|--------|--------|--------|--------|--------|---------|---------|---------|---------|---------|
| 1                   | 1.0              | 1.0    | 1.0    | 1.0    | 1.0    | 1.0    | 1.0    | 1.1    | 1.2    | 1.2     | 1.2     | 1.2     | 1.2     | 1.2     |
| 2                   | 1.2              | 1.2    | 1.2    | 1.2    | 1.2    | 1.2    | 1.2    | 1.2    | 1.2    | 1.2     | 1.2     | 1.3     | 1.3     | 1.3     |
| 3                   | 1.1              | 1.1    | 1.1    | 1.1    | 1.1    | 1.1    | 1.1    | 1.1    | 1.1    | 1.2     | 1.2     | 1.3     | 1.3     | 1.3     |
| 4                   | 1.2              | 1.2    | 1.3    | 1.3    | 1.3    | 1.2    | 1.2    | 1.2    | 1.2    | 1.2     | 1.2     | 1.2     | 1.2     | 1.2     |
| 5                   | 1.3              | 1.3    | 1.3    | 1.3    | 1.3    | 1.3    | 1.3    | 1.3    | 1.3    | 1.3     | 1.4     | 1.4     | 1.4     | 1.4     |
| 6                   | 1.3              | 1.3    | 1.3    | 1.3    | 1.3    | 1.3    | 1.3    | 1.3    | 1.3    | 1.4     | 1.4     | 1.5     | 1.5     | 1.5     |
| 7                   | 1.3              | 1.3    | 1.3    | 1.3    | 1.3    | 1.3    | 1.3    | 1.3    | 1.3    | 1.3     | 1.3     | 1.3     | 1.3     | 1.3     |
| 8                   | 1.2              | 1.2    | 1.2    | 1.2    | 1.2    | 1.2    | 1.2    | 1.2    | 1.3    | 1.3     | 1.3     | 1.3     | 1.3     | 1.4     |
| 9                   | 1.1              | 1.1    | 1.1    | 1.1    | 1.1    | 1.1    | 1.1    | 1.1    | 1.2    | 1.4     | 1.4     | 1.4     | 1.4     | 1.5     |
| 10                  | 1.0              | 1.0    | 1.0    | 1.0    | 1.0    | 1.0    | 1.0    | 1.1    | 1.1    | 1.2     | 1.2     | 1.2     | 1.2     | 1.2     |
| 11                  | 1.0              | 1.0    | 1.0    | 1.0    | 1.0    | 1.0    | 1.1    | 1.1    | 1.1    | 1.2     | 1.2     | 1.2     | 1.2     | 1.3     |
| 12                  | 1.2              | 1.1    | 1.1    | 1.2    | 1.1    | 1.2    | 1.1    | 1.2    | 1.1    | 1.2     | 1.2     | 1.2     | 1.2     | 1.2     |
| 13                  | 1.1              | 1.1    | 1.1    | 1.1    | 1.1    | 1.1    | 1.2    | 1.2    | 1.2    | 1.2     | 1.3     | 1.3     | 1.3     | 1.3     |
| 14                  | 1.1              | 1.1    | 1.1    | 1.1    | 1.2    | 1.1    | 1.2    | 1.2    | 1.3    | 1.3     | 1.3     | 1.3     | 1.3     | 1.4     |
| 15                  | 1.1              | 1.1    | 1.1    | 1.1    | 1.1    | 1.1    | 1.2    | 1.2    | 1.3    | 1.4     | 1.4     | 1.5     | 1.5     | 1.5     |

| Control mouse Number | Treatment Day #1 | Day #2 | Day #3 | Day #4 | Day #5 | Day #6 | Day #7 | Day #8 | Day #9 | Day #10 | Day #11 | Day #12 | Day #13 | Day #14 |
|----------------------|------------------|--------|--------|--------|--------|--------|--------|--------|--------|---------|---------|---------|---------|---------|
| 1                    | 1.0              | 1.0    | 1.0    | 1.0    | 1.0    | 1.0    | 1.0    | 1.0    | 1.0    | 1.1     | 1.1     | 1.1     | 1.1     | 1.1     |
| 2                    | 1.0              | 1.0    | 1.0    | 1.0    | 1.0    | 1.0    | 1.0    | 1.0    | 1.0    | 1.0     | 1.0     | 1.1     | 1.1     | 1.1     |
| 3                    | 0.9              | 0.9    | 0.9    | 0.9    | 0.9    | 0.9    | 1.0    | 1.0    | 1.0    | 1.1     | 1.1     | 1.1     | 1.1     | 1.1     |
| 4                    | 0.9              | 0.9    | 0.9    | 0.9    | 0.9    | 0.9    | 0.9    | 0.9    | 0.9    | 0.9     | 0.9     | 0.9     | 0.9     | 0.9     |
| 5                    | 0.9              | 0.9    | 0.9    | 0.9    | 0.9    | 0.9    | 0.9    | 0.9    | 0.9    | 0.9     | 1.0     | 1.0     | 1.0     | 1.0     |
| 6                    | 1.1              | 1.0    | 1.1    | 1.0    | 1.1    | 1.1    | 1.1    | 1.1    | 1.1    | 1.1     | 1.1     | 1.1     | 1.1     | 1.1     |
| 7                    | 0.9              | 0.9    | 1.0    | 1.0    | 1.0    | 1.0    | 1.0    | 1.0    | 1.0    | 1.0     | 1.0     | 1.0     | 1.0     | 1.0     |
| 8                    | 0.9              | 0.9    | 0.9    | 0.9    | 0.9    | 0.9    | 0.9    | 0.9    | 0.9    | 1.0     | 1.0     | 1.0     | 1.0     | 1.0     |
| 9                    | 1.0              | 1.0    | 1.0    | 1.0    | 1.0    | 1.0    | 1.0    | 1.0    | 1.1    | 1.1     | 1.1     | 1.1     | 1.1     | 1.0     |
| 10                   | 0.9              | 0.9    | 0.9    | 0.9    | 0.9    | 0.9    | 0.9    | 0.9    | 0.9    | 0.9     | 0.9     | 0.9     | 1.0     | 1.0     |
| 11                   | 1.0              | 0.9    | 1.0    | 1.0    | 1.0    | 1.0    | 1.0    | 1.0    | 1.0    | 1.0     | 1.0     | 1.0     | 1.0     | 1.0     |
| 12                   | 0.9              | 0.9    | 0.9    | 0.9    | 0.9    | 0.9    | 1.0    | 1.0    | 1.0    | 1.0     | 1.0     | 0.9     | 0.9     | 0.9     |
| 13                   | 0.9              | 0.9    | 0.9    | 0.9    | 0.9    | 0.9    | 0.9    | 0.9    | 0.9    | 0.9     | 0.9     | 1.0     | 1.0     | 1.0     |
| 14                   | 0.9              | 0.9    | 0.9    | 0.9    | 0.9    | 0.9    | 0.9    | 0.9    | 0.9    | 0.9     | 1.0     | 1.0     | 1.0     | 1.0     |
| 15                   | 0.9              | 0.9    | 0.9    | 0.9    | 0.9    | 0.9    | 0.9    | 0.9    | 0.9    | 0.9     | 0.9     | 1.0     | 1.0     | 1.0     |
