# Supplementary material for: Peptidomimetic blockade of MYB in acute myeloid leukemia
Source: PubMed Central journal article supplement (PMC5760651; doi:10.1038/s41467-017-02618-6), 2018-01-09
Supplement: 41467_2017_2618_MOESM3_ESM.pdf [file 41467_2017_2618_MOESM3_ESM.pdf]

## **Description of Additional Supplementary Files**

**File Name: Supplementary Data 1**

Description: Analysis of gene expression of MOLM13 cells.

**File Name: Supplementary Data 2**

Description: Analysis of MYB occupancy of MV411 cells.

**File Name: Supplementary Data 3**

Description: Analysis of H3K27Ac occupancy of MV411 cells.
